# Supplementary material for: Short-Term Response of Sasa Dwarf Bamboo to a Change of Soil Nitrogen Fertility in a Forest Ecosystem in Northern Hokkaido, Japan
Source: MDPI journal article supplement (doi:10.3390/plants5020019), 2016-04-14
Supplement: s1 [file s1]

# Supplementary Materials: Short-Term Response of Sasa Dwarf Bamboo to a Change of Soil Nitrogen Fertility in a Forest Ecosystem in Northern Hokkaido, Japan

Tsunehiro Watanabe <sup>1,2,\*</sup>, Karibu Fukuzawa <sup>3,†</sup> and Hideaki Shibata <sup>1,†</sup>

**Table S1.** Data of aboveground- and belowground-biomass, and their N concentrations in control, low-, and high-N plots before-N addition with the *P* values of the one-way ANOVA among plots in each category.

| Category                                                                                                      | Control plot |      | Low-N plot |      | High-N plot |      | One-way ANOVA  |
|---------------------------------------------------------------------------------------------------------------|--------------|------|------------|------|-------------|------|----------------|
|                                                                                                               | mean         | SD   | mean       | SD   | mean        | SD   | <i>P</i> value |
| Total aboveground biomass (g DW m <sup>-2</sup> )                                                             | 1733         | 466  | 1931       | 863  | 1607        | 322  | ns             |
| Total aboveground biomass N (g N m <sup>-2</sup> )                                                            | 14.9         | 3.8  | 15.7       | 7.0  | 13.4        | 2.6  | ns             |
| Total leaf number (number m <sup>-2</sup> )                                                                   | 455          | 167  | 492        | 248  | 416         | 91   | ns             |
| Total leaf biomass (g DW m <sup>-2</sup> )                                                                    | 427          | 69   | 432        | 169  | 381         | 85   | ns             |
| Total leaf biomass N (g N m <sup>-2</sup> )                                                                   | 8.6          | 1.8  | 8.6        | 3.6  | 6.8         | 1.2  | ns             |
| Current leaf number (number m <sup>-2</sup> )                                                                 | 195          | 82   | 168        | 77   | 138         | 31   | ns             |
| Current leaf biomass (g DW m <sup>-2</sup> )                                                                  | 167          | 41   | 147        | 51   | 80          | 26   | ns             |
| Current leaf biomass N (g N m <sup>-2</sup> )                                                                 | 3.9          | 0.7  | 3.5        | 1.3  | 2.6         | 0.4  | ns             |
| Previous leaf number (number m <sup>-2</sup> )                                                                | 260          | 110  | 324        | 173  | 278         | 87   | ns             |
| Previous leaf biomass (g DW m <sup>-2</sup> )                                                                 | 261          | 45   | 285        | 118  | 251         | 71   | ns             |
| Previous leaf biomass N (g N m <sup>-2</sup> )                                                                | 4.7          | 1.4  | 5.2        | 2.3  | 4.1         | 1.0  | ns             |
| Total culm number (number m <sup>-2</sup> )                                                                   | 157          | 73   | 203        | 81   | 145         | 27   | ns             |
| Total culm biomass (g DW m <sup>-2</sup> )                                                                    | 1305         | 409  | 1499       | 701  | 1226        | 257  | ns             |
| Total culm biomass N (g N m <sup>-2</sup> )                                                                   | 6.3          | 2.2  | 7.1        | 3.5  | 6.6         | 1.8  | ns             |
| Current culm number (number m <sup>-2</sup> )                                                                 | 45           | 13   | 40         | 19   | 36          | 13   | ns             |
| Current culm biomass (g DW m <sup>-2</sup> )                                                                  | 266          | 96   | 205        | 98   | 200         | 87   | ns             |
| Current culm biomass N (g N m <sup>-2</sup> )                                                                 | 2.0          | 0.5  | 1.6        | 0.9  | 1.5         | 0.7  | ns             |
| Previous culm number (number m <sup>-2</sup> )                                                                | 112          | 70   | 163        | 62   | 109         | 29   | ns             |
| Previous culm biomass (g DW m <sup>-2</sup> )                                                                 | 1040         | 423  | 1293       | 618  | 1025        | 253  | ns             |
| Previous culm biomass N (g N m <sup>-2</sup> )                                                                | 4.3          | 2.7  | 5.4        | 2.7  | 5.0         | 1.6  | ns             |
| Current leaf N concentration (mg g <sup>-1</sup> )                                                            | 23.7         | 2.2  | 23.4       | 1.8  | 20.8        | 1.0  | ns             |
| Current culm N concentration (mg g <sup>-1</sup> )                                                            | 7.9          | 1.8  | 7.3        | 1.5  | 7.6         | 0.5  | ns             |
| Previous leaf N concentration (mg g <sup>-1</sup> )                                                           | 17.1         | 2.0  | 17.6       | 2.1  | 16.6        | 1.4  | ns             |
| Previous culm N concentration (mg g <sup>-1</sup> )                                                           | 4.4          | 1.3  | 4.6        | 0.4  | 5.1         | 1.2  | ns             |
| Total belowground biomass (g DW m <sup>-2</sup> )                                                             | 322          | 185  | 545        | 308  | 688         | 146  | ns             |
| Total belowground biomass N (g N m <sup>-2</sup> )                                                            | 3.2          | 2.0  | 4.6        | 2.6  | 5.5         | 1.1  | ns             |
| Fine root N concentration in 0-15 cm depth (mg g <sup>-1</sup> )                                              | 10.6         | 1.8  | 9.9        | 0.7  | 9.9         | 0.9  | ns             |
| Fine root N concentration in 15-30 cm depth (mg g <sup>-1</sup> )                                             | 9.7          | 2.8  | 8.2        | 0.8  | 8.5         | 0.4  | ns             |
| Soil inorganic N (NH <sub>4</sub> <sup>+</sup> and NO <sub>3</sub> <sup>-</sup> ) amount (g m <sup>-2</sup> ) | 5.11         | 0.95 | 4.10       | 1.39 | 3.50        | 1.18 | ns             |

ns means no significant.

**Table S2.** Data of aboveground- and belowground-biomass, and their N concentrations in control, low-, and high-N plots after N addition with the *P* values of the two-way ANOVA (year, N amount, and the interaction).

| Year                                               | Control plot |     | Low-N plot        |      | High-N plot |    |      |      |    | Two-way ANOVA     | P value |
|----------------------------------------------------|--------------|-----|-------------------|------|-------------|----|------|------|----|-------------------|---------|
|                                                    | mean         | SD  | mean              | SD   | mean        | SD |      |      |    |                   |         |
| Total aboveground biomass (g DW m <sup>-2</sup> )  |              |     |                   |      |             |    |      |      |    |                   |         |
| 1year After                                        | 1290         | 556 | aA <sup>(1)</sup> | 1257 | 633         | aA | 2060 | 1238 | aA | Year (Y)          | ns      |
| 2year After                                        | 979          | 676 | abA               | 981  | 281         | bA | 2325 | 861  | aA | Treatment (T)     | <0.05   |
|                                                    |              |     |                   |      |             |    |      |      |    | Interaction T × Y | ns      |
| Total aboveground biomass N (g N m <sup>-2</sup> ) |              |     |                   |      |             |    |      |      |    |                   |         |
| 1year After                                        | 10.2         | 3.5 | aA                | 9.3  | 5.2         | aA | 19.1 | 10.9 | aA | Year (Y)          | ns      |
| 2year After                                        | 11.2         | 6.9 | abA               | 8.5  | 2.8         | bA | 21.4 | 6.4  | aA | Treatment (T)     | <0.01   |
|                                                    |              |     |                   |      |             |    |      |      |    | Interaction T × Y | ns      |
| Total culm number (number m <sup>-2</sup> )        |              |     |                   |      |             |    |      |      |    |                   |         |
| 1year After                                        | 101          | 45  | aA                | 114  | 61          | aA | 178  | 103  | aA | Year (Y)          | ns      |
| 2year After                                        | 84           | 59  | bA                | 90   | 39          | bA | 238  | 49   | aA | Treatment (T)     | <0.01   |
|                                                    |              |     |                   |      |             |    |      |      |    | Interaction T × Y | ns      |
| Total culm biomass (g DW m <sup>-2</sup> )         |              |     |                   |      |             |    |      |      |    |                   |         |
| 1year After                                        | 969          | 423 | aA                | 960  | 446         | aA | 1464 | 927  | aA | Year (Y)          | ns      |
| 2year After                                        | 761          | 569 | aA                | 776  | 228         | aA | 1814 | 697  | aA | Treatment (T)     | ns      |
|                                                    |              |     |                   |      |             |    |      |      |    | Interaction T × Y | ns      |
| Total culm biomass N (g N m <sup>-2</sup> )        |              |     |                   |      |             |    |      |      |    |                   |         |
| 1year After                                        | 4.1          | 0.9 | aA                | 3.8  | 1.0         | aA | 7.7  | 4.9  | aA | Year (Y)          | ns      |
| 2year After                                        | 6.8          | 5.2 | aA                | 4.6  | 1.6         | aA | 10.6 | 3.0  | aA | Treatment (T)     | ns      |
|                                                    |              |     |                   |      |             |    |      |      |    | Interaction T × Y | ns      |
| Current culm number (number m <sup>-2</sup> )      |              |     |                   |      |             |    |      |      |    |                   |         |
| 1year After                                        | 15           | 11  | aA                | 20   | 28          | aA | 32   | 20   | aA | Year (Y)          | ns      |
| 2year After                                        | 32           | 17  | abA               | 19   | 15          | bA | 59   | 16   | aA | Treatment (T)     | <0.05   |
|                                                    |              |     |                   |      |             |    |      |      |    | Interaction T × Y | ns      |
| Current culm biomass (g DW m <sup>-2</sup> )       |              |     |                   |      |             |    |      |      |    |                   |         |
| 1year After                                        | 85           | 43  | aA                | 71   | 87          | aA | 140  | 93   | aA | Year (Y)          | ns      |
| 2year After                                        | 302          | 175 | aA                | 220  | 174         | aA | 343  | 262  | aA | Treatment (T)     | ns      |
|                                                    |              |     |                   |      |             |    |      |      |    | Interaction T × Y | ns      |
| Current culm biomass N (g N m <sup>-2</sup> )      |              |     |                   |      |             |    |      |      |    |                   |         |
| 1year After                                        | 0.6          | 0.3 | aB                | 0.4  | 0.5         | aA | 1.0  | 0.7  | aA | Year (Y)          | <0.05   |
| 2year After                                        | 3.5          | 2.4 | aA                | 1.9  | 1.4         | aA | 3.0  | 1.5  | aA | Treatment (T)     | ns      |
|                                                    |              |     |                   |      |             |    |      |      |    | Interaction T × Y | ns      |
| Previous culm number (number m <sup>-2</sup> )     |              |     |                   |      |             |    |      |      |    |                   |         |
| 1year After                                        | 86           | 35  | aA                | 94   | 37          | aA | 146  | 83   | aA | Year (Y)          | ns      |
| 2year After                                        | 52           | 45  | bA                | 71   | 32          | bA | 179  | 47   | aA | Treatment (T)     | <0.01   |
|                                                    |              |     |                   |      |             |    |      |      |    | Interaction T × Y | ns      |
| Previous culm biomass (g DW m <sup>-2</sup> )      |              |     |                   |      |             |    |      |      |    |                   |         |
| 1year After                                        | 883          | 386 | aA                | 889  | 389         | aA | 1324 | 836  | aA | Year (Y)          | ns      |
| 2year After                                        | 458          | 397 | bA                | 556  | 183         | bA | 1471 | 477  | aA | Treatment (T)     | <0.05   |
|                                                    |              |     |                   |      |             |    |      |      |    | Interaction T × Y | ns      |

Table S2. Cont.

| Year                                                              | Control plot |      | Low-N plot |      | High-N plot |    | Two-way ANOVA |     |    | P value           |       |
|-------------------------------------------------------------------|--------------|------|------------|------|-------------|----|---------------|-----|----|-------------------|-------|
|                                                                   | mean         | SD   | mean       | SD   | mean        | SD |               |     |    |                   |       |
| Previous culm biomass N (g N m <sup>-2</sup> )                    |              |      |            |      |             |    |               |     |    |                   |       |
| 1year After                                                       | 3.5          | 0.7  | aA         | 3.4  | 0.7         | aA | 6.7           | 4.2 | aA | Year (Y)          | ns    |
| 2year After                                                       | 3.3          | 2.8  | bA         | 2.7  | 0.6         | bA | 7.6           | 1.6 | aA | Treatment (T)     | <0.01 |
|                                                                   |              |      |            |      |             |    |               |     |    | Interaction T × Y | ns    |
| Current leaf N concentration (mg g <sup>-1</sup> )                |              |      |            |      |             |    |               |     |    |                   |       |
| 1year After                                                       | 21.6         | 1.8  | aA         | 21.1 | 1.9         | aA | 22.4          | 0.9 | aA | Year (Y)          | ns    |
| 2year After                                                       | 23.9         | 1.7  | aA         | 23.2 | 1.0         | aA | 23.4          | 1.4 | aA | Treatment (T)     | ns    |
|                                                                   |              |      |            |      |             |    |               |     |    | Interaction T × Y | ns    |
| Current culm N concentration (mg g <sup>-1</sup> )                |              |      |            |      |             |    |               |     |    |                   |       |
| 1year After                                                       | 6.8          | 0.8  | aB         | 5.4  | 0.1         | aB | 7.4           | 0.6 | aB | Year (Y)          | <0.05 |
| 2year After                                                       | 10.6         | 2.5  | aA         | 8.8  | 1.9         | aA | 9.5           | 2.1 | aA | Treatment (T)     | ns    |
|                                                                   |              |      |            |      |             |    |               |     |    | Interaction T × Y | <0.05 |
| Previous leaf N concentration (mg g <sup>-1</sup> )               |              |      |            |      |             |    |               |     |    |                   |       |
| 1year After                                                       | 17.2         | 0.9  | aA         | 16.7 | 2.7         | aA | 17.5          | 1.3 | aA | Year (Y)          | ns    |
| 2year After                                                       | 17.1         | 0.0  | aA         | 16.7 | 1.0         | aA | 19.7          | 1.5 | aA | Treatment (T)     | ns    |
|                                                                   |              |      |            |      |             |    |               |     |    | Interaction T × Y | ns    |
| Previous culm N concentration (mg g <sup>-1</sup> )               |              |      |            |      |             |    |               |     |    |                   |       |
| 1year After                                                       | 4.6          | 1.1  | aB         | 4.7  | 0.6         | aA | 5.4           | 0.8 | aA | Year (Y)          | <0.05 |
| 2year After                                                       | 7.2          | 0.2  | aA         | 5.2  | 1.0         | aA | 5.4           | 0.7 | aA | Treatment (T)     | ns    |
|                                                                   |              |      |            |      |             |    |               |     |    | Interaction T × Y | ns    |
| Total belowground biomass (g DW m <sup>-2</sup> )                 |              |      |            |      |             |    |               |     |    |                   |       |
| 1year After                                                       | 1480         | 1123 | aA         | 1269 | 708         | aA | 990           | 645 | aA | Year (Y)          | ns    |
| 2year After                                                       | 681          | 330  | aA         | 498  | 245         | aA | 769           | 650 | aA | Treatment (T)     | ns    |
|                                                                   |              |      |            |      |             |    |               |     |    | Interaction T × Y | ns    |
| Total belowground biomass N (g N m <sup>-2</sup> )                |              |      |            |      |             |    |               |     |    |                   |       |
| 1year After                                                       | 10.4         | 6.7  | aA         | 7.3  | 3.9         | aA | 8.1           | 5.7 | aA | Year (Y)          | ns    |
| 2year After                                                       | 7.3          | 2.8  | aA         | 4.6  | 1.9         | aA | 5.6           | 3.5 | aA | Treatment (T)     | ns    |
|                                                                   |              |      |            |      |             |    |               |     |    | Interaction T × Y | ns    |
| Fine root N concentration in 0-15 cm depth (mg g <sup>-1</sup> )  |              |      |            |      |             |    |               |     |    |                   |       |
| 1year After                                                       | 10.2         | 1.5  | aA         | 9.4  | 2.8         | aA | 9.2           | 1.0 | aA | Year (Y)          | ns    |
| 2year After                                                       | 12.6         | 2.0  | aA         | 12.1 | 3.0         | aA | 9.3           | 0.7 | aA | Treatment (T)     | ns    |
|                                                                   |              |      |            |      |             |    |               |     |    | Interaction T × Y | ns    |
| Fine root N concentration in 15-30 cm depth (mg g <sup>-1</sup> ) |              |      |            |      |             |    |               |     |    |                   |       |
| 1year After                                                       | 6.4          | 1.6  | aA         | 7.6  | 0.4         | aA | 6.5           | 0.7 | aB | Year (Y)          | <0.05 |
| 2year After                                                       | 8.7          | 1.3  | aA         | 7.6  | 1.2         | aA | 8.2           | 1.4 | aA | Treatment (T)     | ns    |
|                                                                   |              |      |            |      |             |    |               |     |    | Interaction T × Y | ns    |

1year and 2year after means September 2008 and 2009, respectively; <sup>(1)</sup> Different lower-case letters indicate significant differences among plots in each year ( $P < 0.05$ , Tukey's HSD). Different capital letters indicate significant differences between years in each plot ( $P < 0.05$ ,  $t$ -test) in each category; ns means no significant.

**Table S3.** Total litterfall amount, N amount, and the N concentrations in leaf and culm litterfall from August 2007 to June 2008 in control, low-, and high-N plots before N addition with *P* values of the one-way ANOVA among plots in each category.

| Category                                              | Control plot |     |   | Low-N plot |     |   | High-N plot |     |    | One-way ANOVA |
|-------------------------------------------------------|--------------|-----|---|------------|-----|---|-------------|-----|----|---------------|
|                                                       | mean         | SD  |   | mean       | SD  |   | mean        | SD  |    |               |
| Total litterfall amount (g m <sup>-2</sup> )          | 98           | 85  | a | 89         | 27  | a | 113         | 62  | a  | ns            |
| Total litterfall N amount (g m <sup>-2</sup> )        | 1.1          | 1.1 | a | 0.8        | 0.2 | a | 1.0         | 0.4 | a  | ns            |
| Leaf litterfall N concentration (mg g <sup>-1</sup> ) | 11.8         | 2.6 | a | 12.1       | 1.8 | a | 11.4        | 1.8 | a  | ns            |
| Culm litterfall N concentration (mg g <sup>-1</sup> ) | 8.2          | 2.5 | a | 4.8        | 0.7 | b | 5.2         | 1.3 | ab | <0.05         |

ns means no significant; Leaf and culm litterfall N concentration shows the weighted-mean N concentration that is calculated by dividing the sum of N mass of the monthly litterfall by total litterfall mass.

**Table S4.** Total litterfall amount, N amount, and the N concentrations in leaf and culm litterfall in control, low-, and high-N plots after N addition with *P* values of the two-way ANOVA.

| Year                                                  | Control plot |     | Low-N plot        |      | High-N plot |    |      |     | Two-way ANOVA | P value           |    |
|-------------------------------------------------------|--------------|-----|-------------------|------|-------------|----|------|-----|---------------|-------------------|----|
|                                                       | mean         | SD  | mean              | SD   | mean        | SD |      |     |               |                   |    |
| Total litterfall amount (g m <sup>-2</sup> )          |              |     |                   |      |             |    |      |     |               |                   |    |
| 1year After                                           | 124          | 100 | aA <sup>(1)</sup> | 152  | 61          | aA | 184  | 34  | aA            | Year (Y)          | ns |
| 2year After                                           | 148          | 30  | aA                | 133  | 86          | aA | 131  | 36  | aA            | Treatment (T)     | ns |
|                                                       |              |     |                   |      |             |    |      |     |               | Interaction T × Y | ns |
| Total litterfall N amount (g N m <sup>-2</sup> )      |              |     |                   |      |             |    |      |     |               |                   |    |
| 1year After                                           | 1.1          | 0.7 | aA                | 1.1  | 0.4         | aA | 1.9  | 0.4 | aA            | Year (Y)          | ns |
| 2year After                                           | 1.3          | 0.2 | aA                | 1.2  | 1.0         | aA | 1.0  | 0.1 | aA            | Treatment (T)     | ns |
|                                                       |              |     |                   |      |             |    |      |     |               | Interaction T × Y | ns |
| Leaf litterfall N concentration (mg g <sup>-1</sup> ) |              |     |                   |      |             |    |      |     |               |                   |    |
| 1year After                                           | 13.1         | 1.4 | aA                | 14.4 | 0.5         | aA | 14.3 | 2.4 | aA            | Year (Y)          | ns |
| 2year After                                           | 11.9         | 1.0 | aA                | 12.4 | 2.4         | aA | 11.9 | 1.6 | aA            | Treatment (T)     | ns |
|                                                       |              |     |                   |      |             |    |      |     |               | Interaction T × Y | ns |
| Culm litterfall N concentration (mg g <sup>-1</sup> ) |              |     |                   |      |             |    |      |     |               |                   |    |
| 1year After                                           | 4.7          | 1.2 | aA                | 3.7  | 0.9         | aA | 4.8  | 0.8 | aA            | Year (Y)          | ns |
| 2year After                                           | 3.9          | 0.5 | aA                | 3.9  | 1.3         | aA | 4.8  | 1.2 | aA            | Treatment (T)     | ns |
|                                                       |              |     |                   |      |             |    |      |     |               | Interaction T × Y | ns |

1year and 2 year after means June 2008–2009 and June 2009–2010, respectively; <sup>(1)</sup> Different lower-case letters indicate significant differences among plots in each year ( $P < 0.05$ , Tukey's HSD). Different capital letters indicate significant differences between years in each plot ( $P < 0.05$ , *t*-test) in each category; ns means no significant; Leaf and culm litterfall N concentration shows the weighted-mean N concentration that is calculated by dividing the sum of N mass of the monthly litterfall by total litterfall mass.
